# Supplementary material for: A Genome-Scale Metabolic Model for Methylococcus capsulatus (Bath) Suggests Reduced Efficiency Electron Transfer to the Particulate Methane Monooxygenase
Source: PubMed Central journal article supplement (PMC6288188; doi:10.3389/fmicb.2018.02947), 2018-12-04

# Genome-scale Metabolic Map

High-resolution image of the genome-scale metabolic map of iMcBath. This metabolic map was constructed using escher ([escher.github.io](http://escher.github.io)) and is available at [github.com/ChristianLieven/memote-m-capsulatus](https://github.com/ChristianLieven/memote-m-capsulatus)

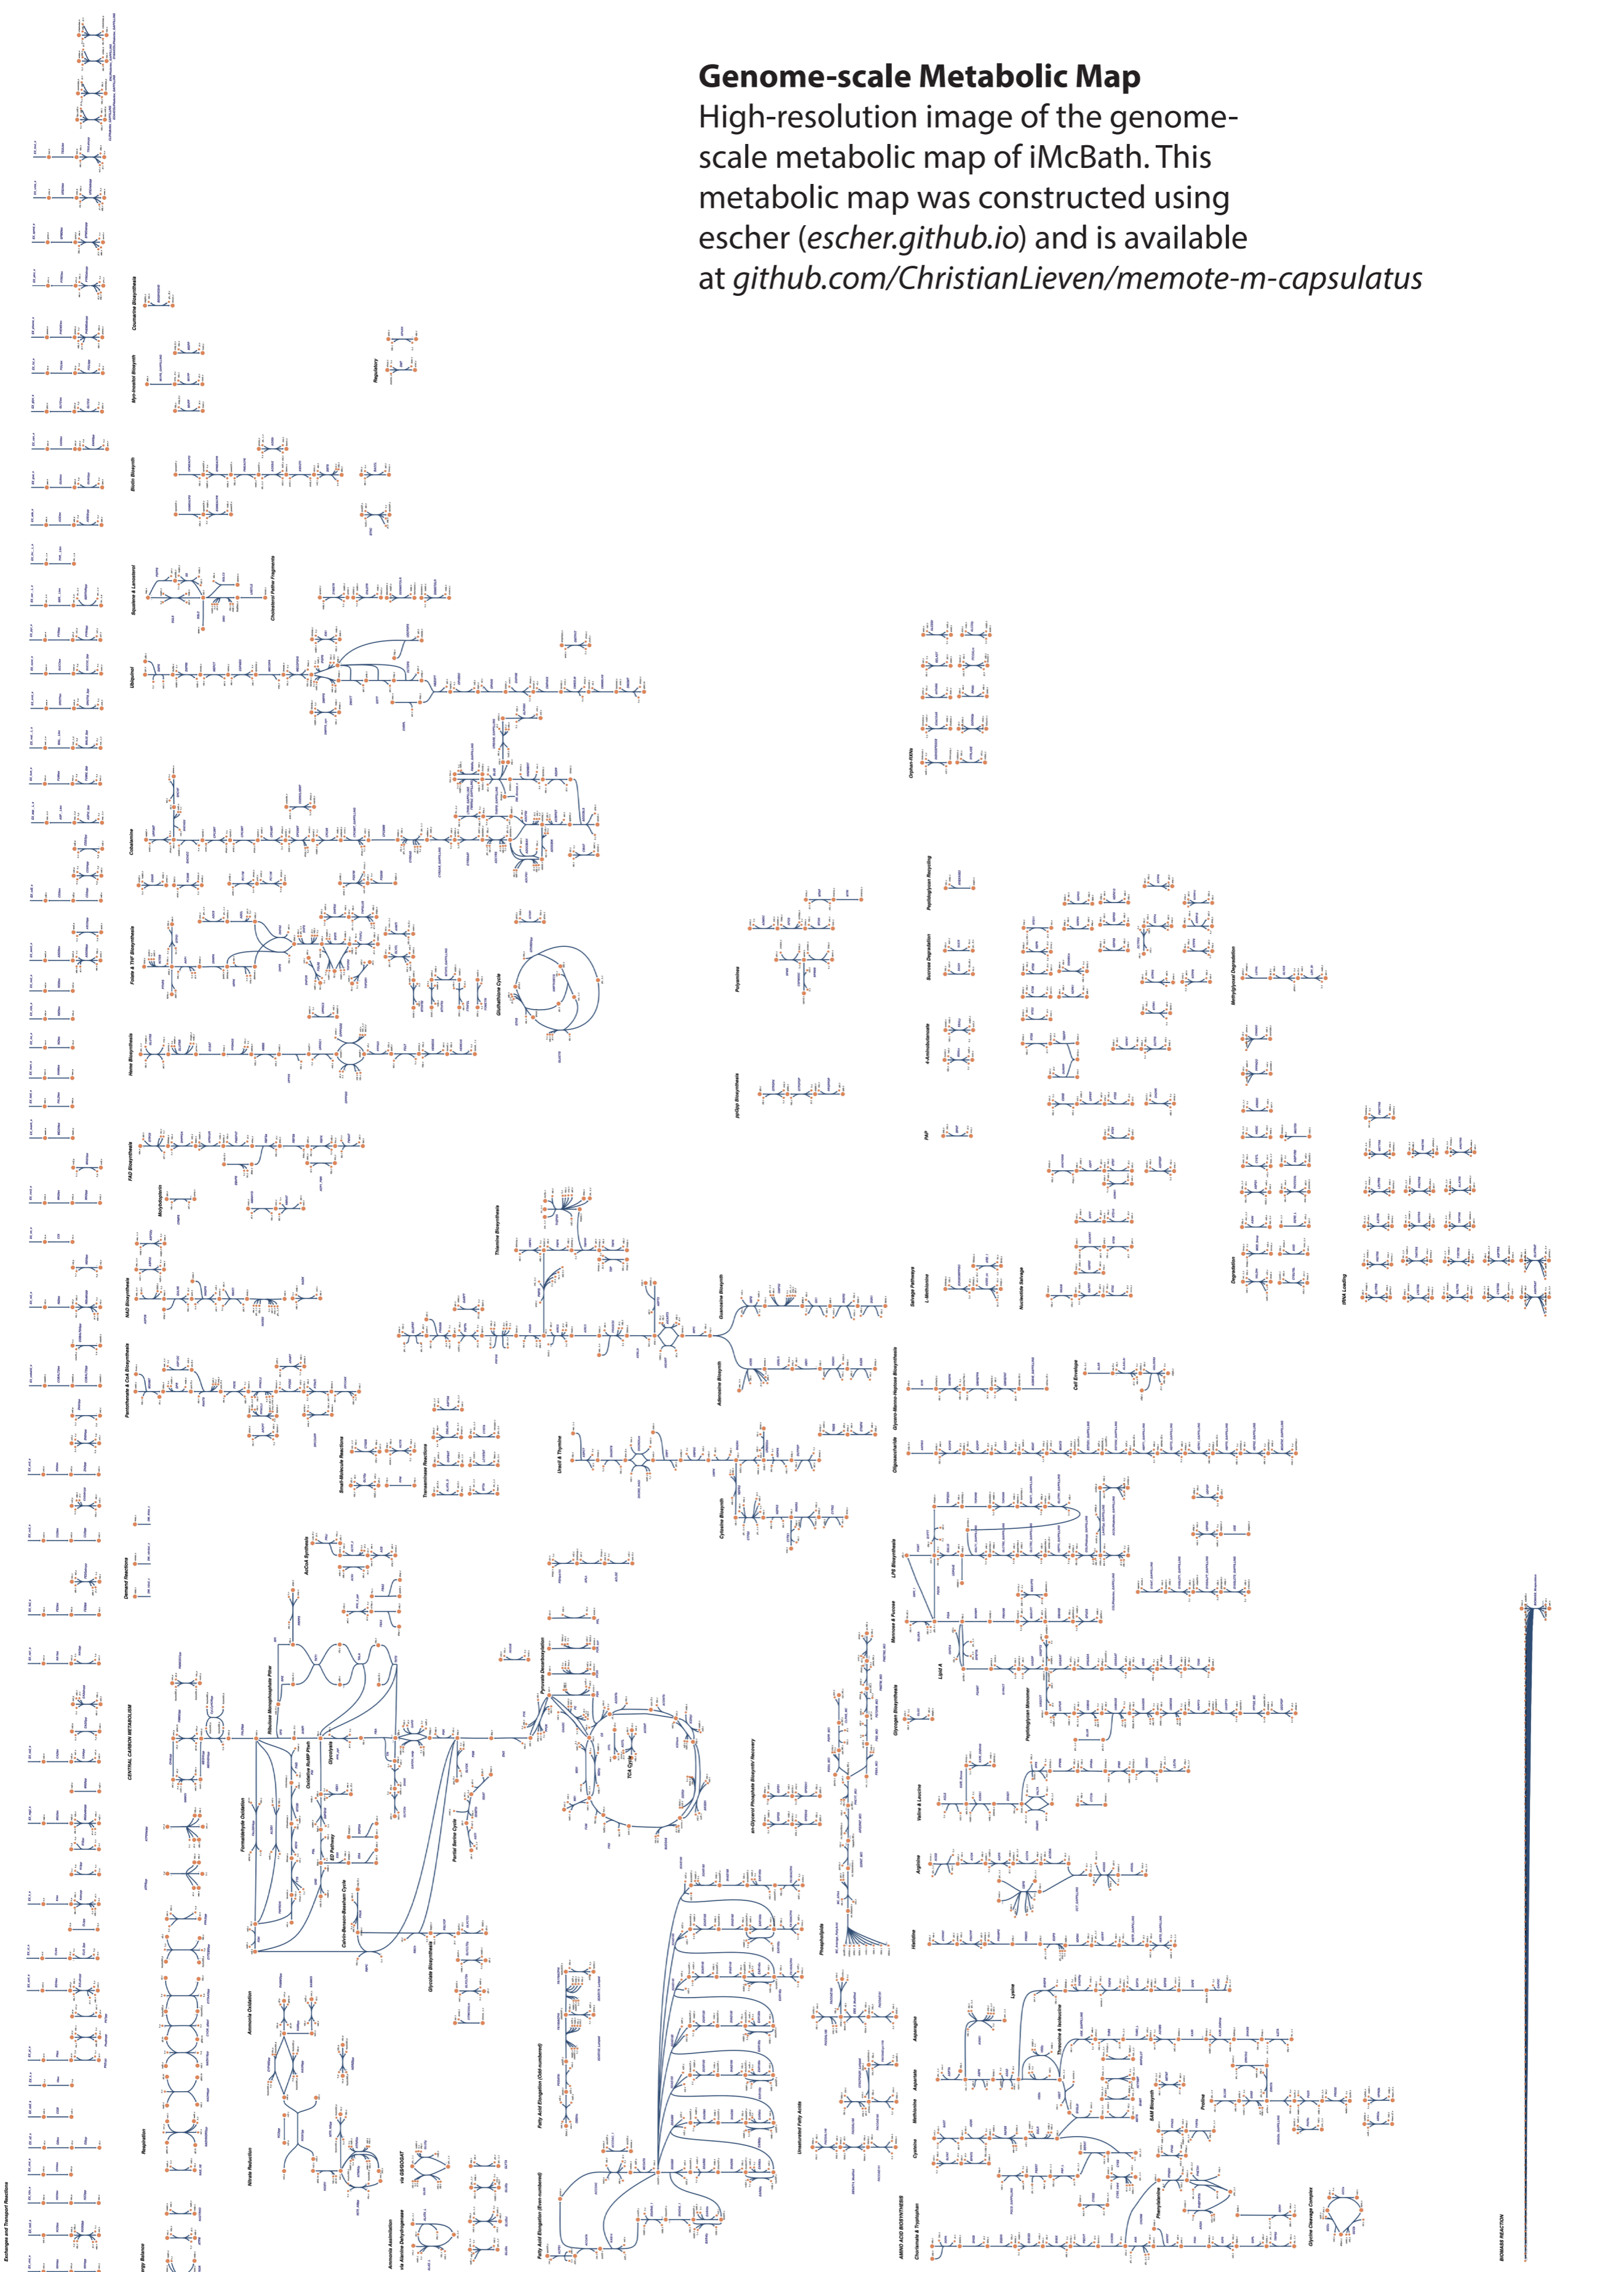

Supplement: Image_1.pdf [file Image_1.pdf]
